# Supplementary material for: Coding Efficiency of Fly Motion Processing Is Set by Firing Rate, Not Firing Precision
Source: PLOS journal article supplement (doi:10.1371/journal.pcbi.1000860), 2010-07-22
Supplement: S1 (10.1371/journal.pcbi.1000860.s001) [file journal.pcbi.1000860.s001]

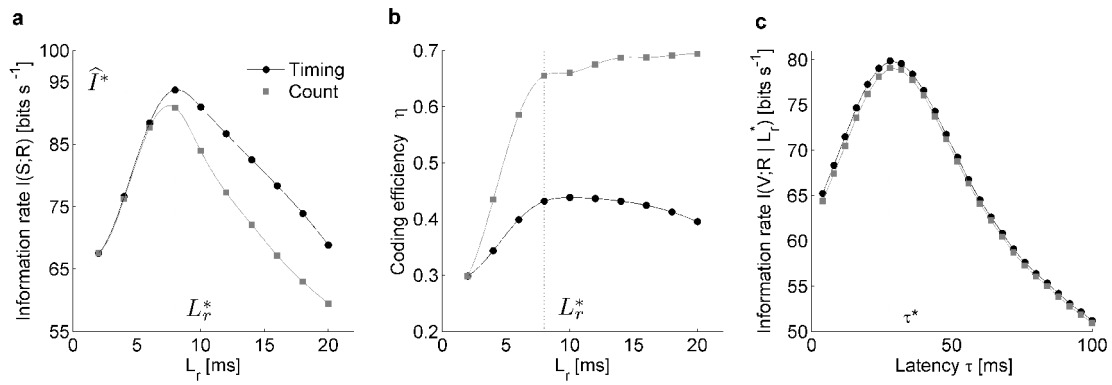

**Figure S1:** Information rate as a function of the encoding window. **a.** The information rate between stimulus and a representative H1 response as a function of the encoding window, for timing and count encoding modes.  $L_r^*$  is the encoding window where the information rate in the timing mode is maximal. **b.** Respective coding efficiencies. **c.** Information rates (timing mode) between the discretized velocity and the response, calculated at the optimal encoding window. Response latency  $\tau^*$  was defined as the lag that maximizes the information rate.
